# Supplementary material
Source: Springer Nature journal article supplement (https://www.springermedizin.de/resource/supplementary/12904_2013_195_MOESM1_ESM.pdf/9517862)

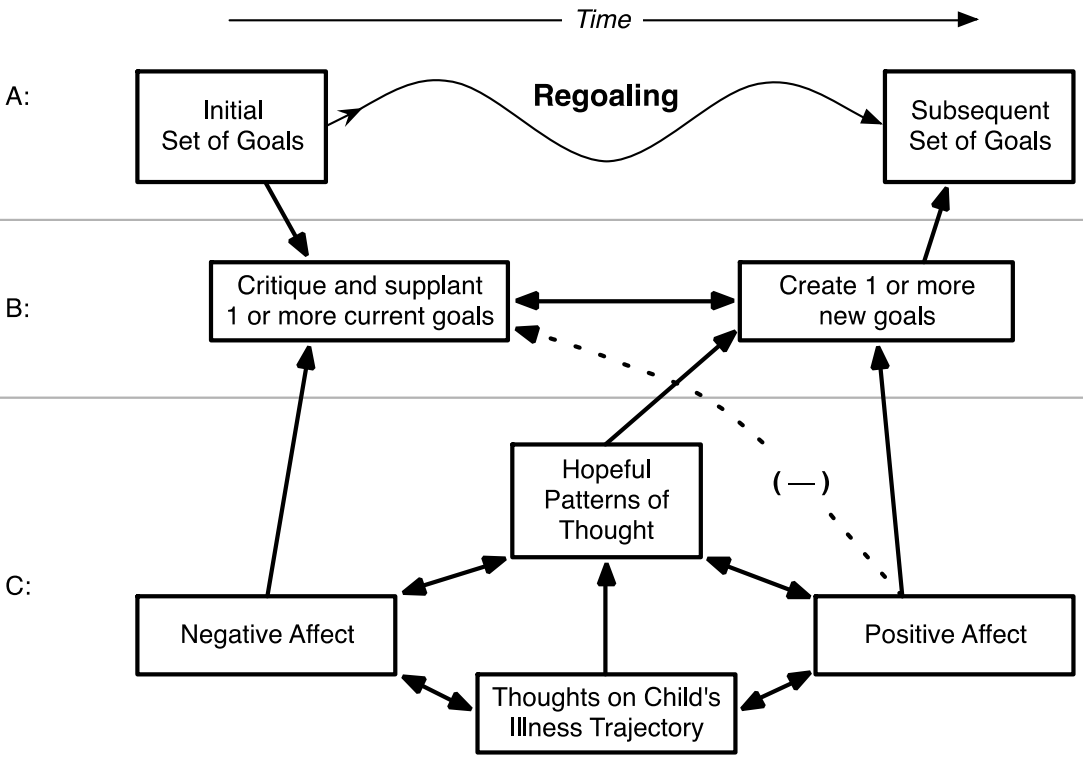

Supplement: MOESM1 [file 9517862]
